# Supplementary material
Source: publisher figshare collection journal article supplement (https://acs.figshare.com/ndownloader/files/3981121)
Supplement: Supplementary file 1 [file 3981121]

## Supporting Information

# A Sulfur- and Nitrogen-Doped, Ferrocene-Derived Mesoporous Carbons with Efficient Electrochemical Reduction of Oxygen

Jiaoxing Xu,<sup>1,2</sup> Yi Zhao,<sup>1,2</sup> Cai Shen<sup>3</sup> and Lunhui Guan<sup>\*1,2</sup>

1. State Key Lab of Structural Chemistry, Fujian Institute of Research on the Structure of Matter, Chinese Academy of Sciences, YangQiao West Road 155#, Fuzhou, Fujian 350002, P.R. China.
2. Key Laboratory of design and assembly of functional nanostructures, Chinese Academy of Sciences.
3. Ningbo Institute of Materials Technology & Engineering, Chinese Academy of Sciences, Ningbo 615201, China.

Fax: 86-591-8379 2835; Tel: 86-591-8379 2835

E-mail: [guanlh@fjirsm.ac.cn](mailto:guanlh@fjirsm.ac.cn)

### 1. A schematic drawing of CVD reaction system

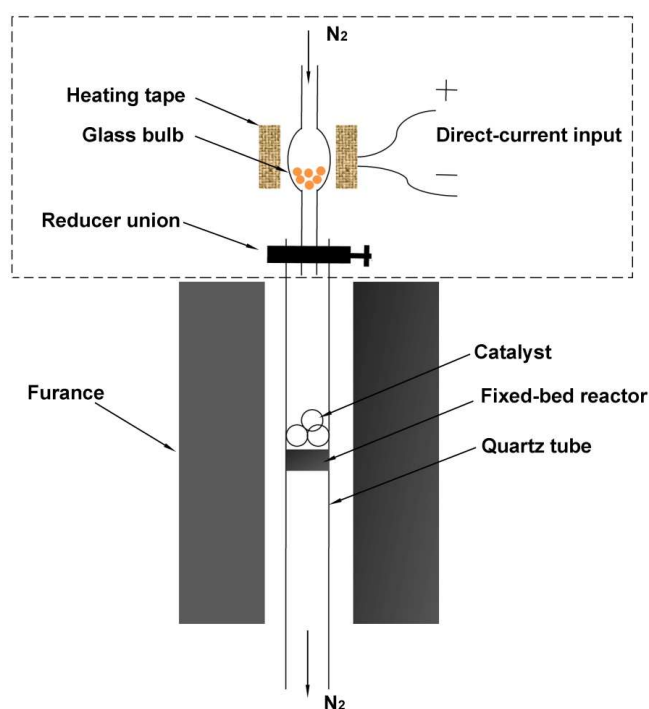

**Scheme S1.** Schematic drawings of the CVD reaction system equipped with a ferrocene sublimation-vapor generator (dashed-line section)

## 2. Additional experimental data

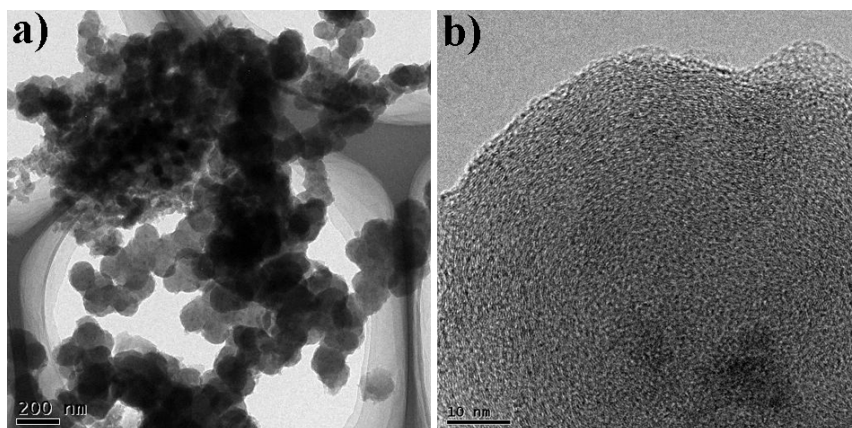

**Figure S1.** a) TEM image and b) HR-TEM image of the oligoporous SN-C prepared in template-free CVD condition.

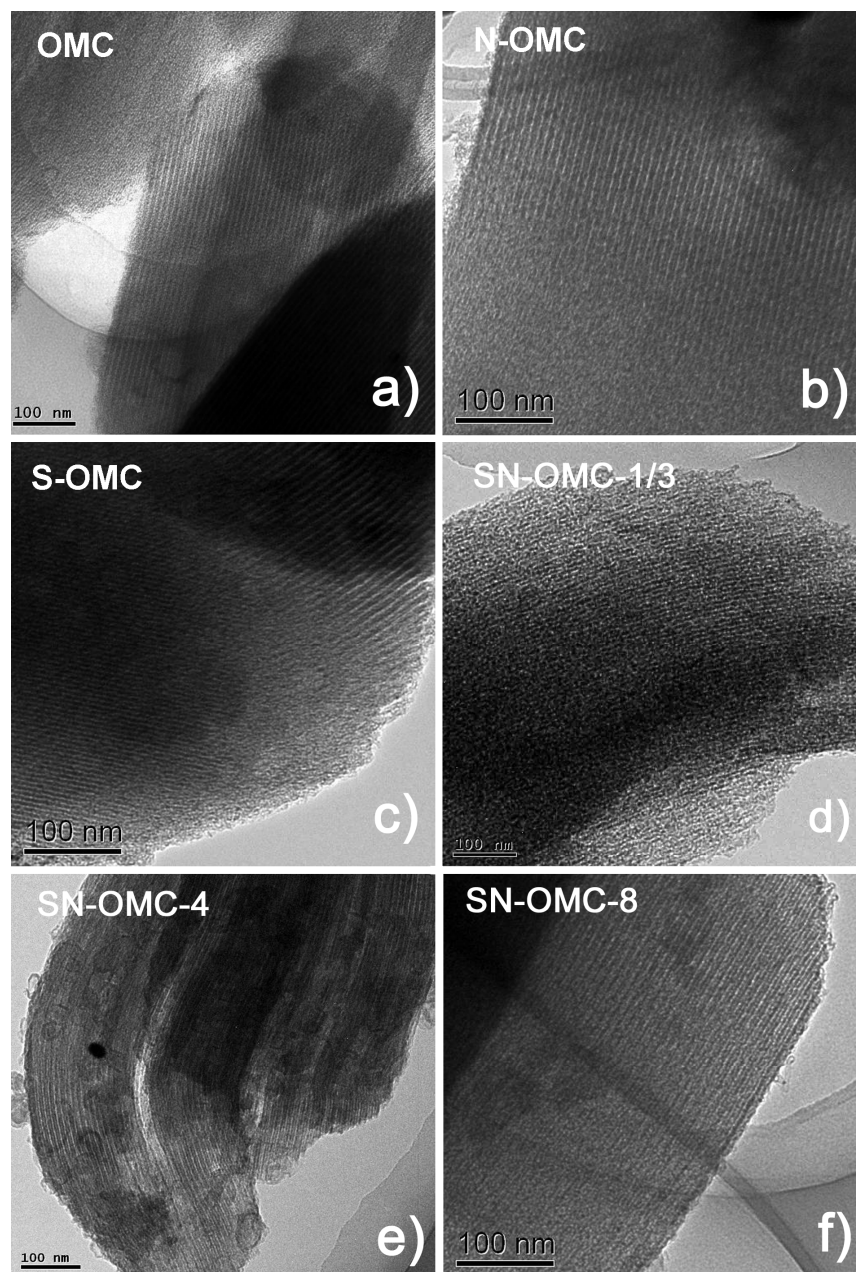

**Figure S2.** Typical TEM images of a) undoped OMC, b) N-OMC, c) S-OMC, d) SN-OMC-1/3, e) SN-OMC-4, and f) SN-OMC-8.

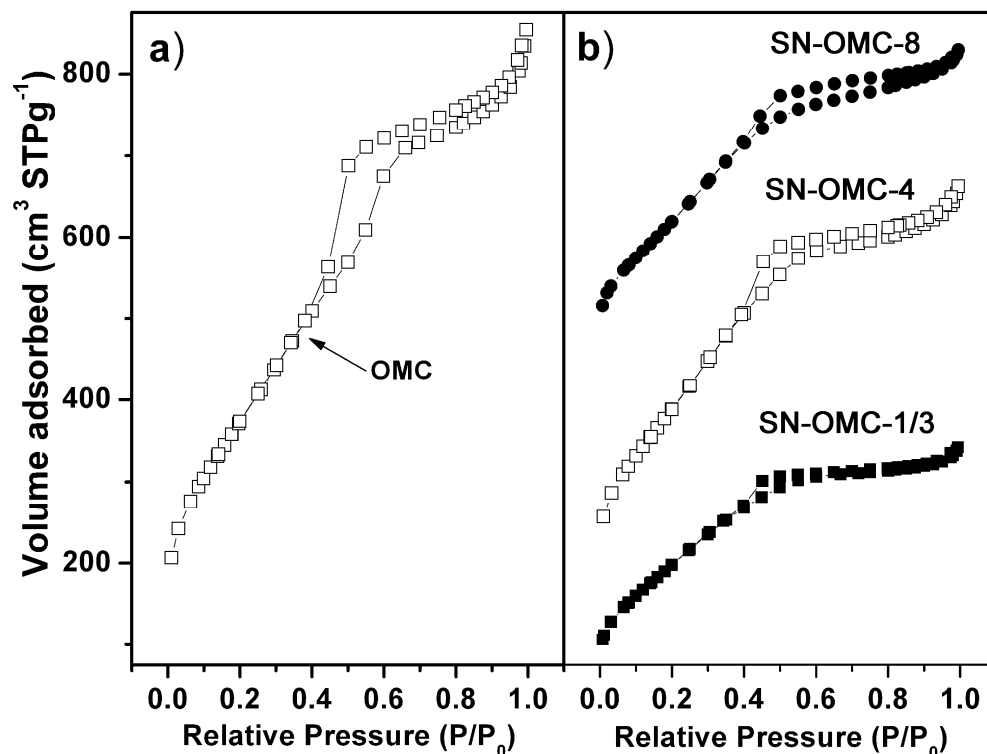

**Figure S3.**  $N_2$ -sorption isotherm curves of a) OMC for CVD-growth of 4 h and b) the SN-OMC-1/3, SN-OMC-4 and SN-OMC-8. The isotherms of SN-OMC-4 and SN-OMC-8 were offset vertically by 100 and 400  $\text{cm}^3 \text{g}^{-1}$ , respectively.

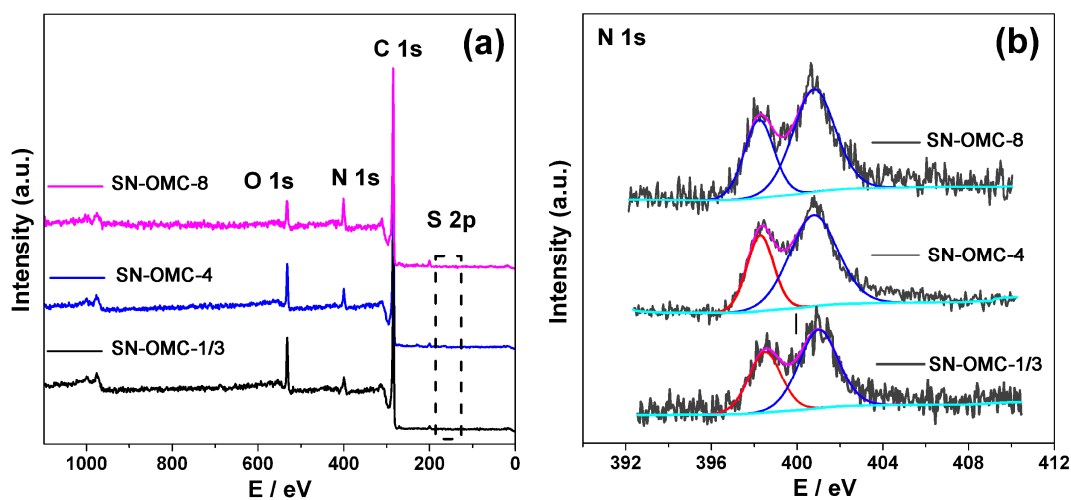

**Figure S4.** a) XPS survey spectra and b) high-resolution  $N1s$  spectra for SN-OMC-1/3, SN-OMC-4 and SN-OMC-8 samples: the black and purple lines are the raw and fitted spectra, respectively; the red and blue lines correspond to pyridinic-N (398.1 eV) and pyrrolic/graphitic-N (400.8 eV), respectively according to reference.<sup>2</sup>

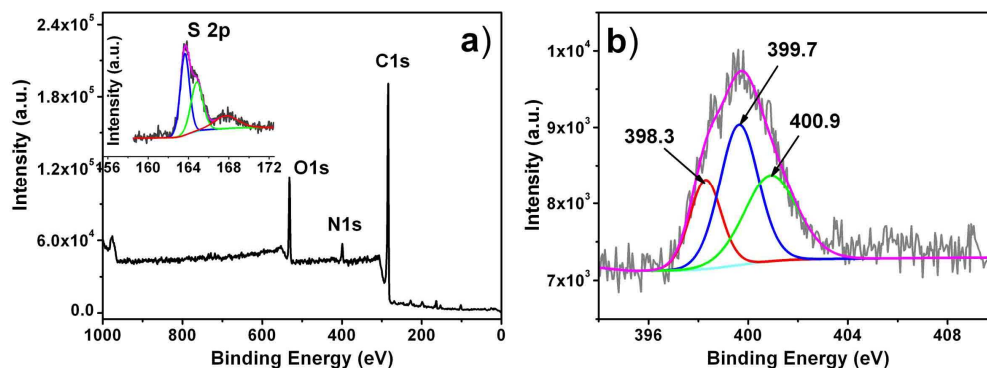

**Figure S5.** a) XPS survey spectrum of SN-C, the inset shows the corresponding S 2p spectrum. b) High resolution N 1s spectrum: the grey and purple lines are the raw and fitted spectra; the red, blue and green lines correspond to pyridinic-N (398.3 eV) and pyrrolic-N (399.7 eV) and graphitic-N (400.9 eV), respectively.

**Table S1.** Physicochemical properties of OMC, S-OMC, N-OMC, SN-C, SN-OMC-4 and SN-OMC-16 samples.

| Catalyst  | SA <sup>a)</sup>                   | PV <sup>b)</sup>                    | PD <sup>c)</sup> | At% <sup>d)</sup> |      |      |                 |       |
|-----------|------------------------------------|-------------------------------------|------------------|-------------------|------|------|-----------------|-------|
|           | [m <sup>2</sup> ·g <sup>-1</sup> ] | [cm <sup>3</sup> ·g <sup>-1</sup> ] | [nm]             | C                 | O    | S    | N <sup>d)</sup> |       |
| OMC       | 1390                               | 1.32                                | 3.9/2.4          | 88.5              | 11.5 | --   | --              | --    |
| S-OMC     | 688                                | 0.71                                | 3.5/2.4          | 89.8              | 9.2  | 1.0  | --              | --    |
| N-OMC     | 556                                | 0.5                                 | 3.5/2.4          | 81.1              | 15.4 | --   | 2.8             | 3.4   |
| SN-C      | --                                 | --                                  | --               | 80.7              | 13.6 | 1.85 | 0.83            | 2.96  |
| SN-OMC-16 | 680                                | 0.70                                | 3.2              | 74.8              | 4.9  | 2.1  | 4.6             | 12.75 |

<sup>a)</sup> Specific surface area from multiple BET method; <sup>b)</sup> Total pore volume at P/P<sub>0</sub> = 0.99; <sup>c)</sup> Average pore diameter, estimated using the desorption branch of the isotherm and the Barrett–Joyner–Halenda formula; <sup>d)</sup> Atomic ratio data from XPS analyses; <sup>e)</sup> Pyridinic-N, at ~398.3 eV; <sup>f)</sup> Pyrrolic/graphitic-N, at ~400~402 eV according to reference.<sup>2</sup>

**Table S2.** The electrochemical activity of OMC, SN-C, SN-OMC-4 and SN-OMC-16 sample for ORR.

| Catalyst  | $E_{\text{onset}} / E_{1/2}$ <sup>a)</sup> | $J_{\kappa}$ <sup>b)</sup> | $n$ <sup>c)</sup> |
|-----------|--------------------------------------------|----------------------------|-------------------|
|           | [mV/mV]                                    | [mA·cm <sup>-2</sup> ]     |                   |
| OMC       | -186/-229                                  | 5.4                        | 2.4               |
| S-OMC     | -136/-203                                  | 14.2                       | 2.1               |
| N-OMC     | -75/-138                                   | 26.0                       | 3.8               |
| SN-C      | -280/-350                                  | 2.4                        | 2.3               |
| SN-OMC-16 | -60/-144                                   | 22.5                       | 4.0               |

a) Onset potential ( $E_{\text{onset}}$ ) and half-wave potential ( $E_{1/2}$ ), estimated LSV measurement curves; b) Kinetically limiting diffusion current density at -0.3 V vs. Ag/AgCl; c) The number of electron-transfer.

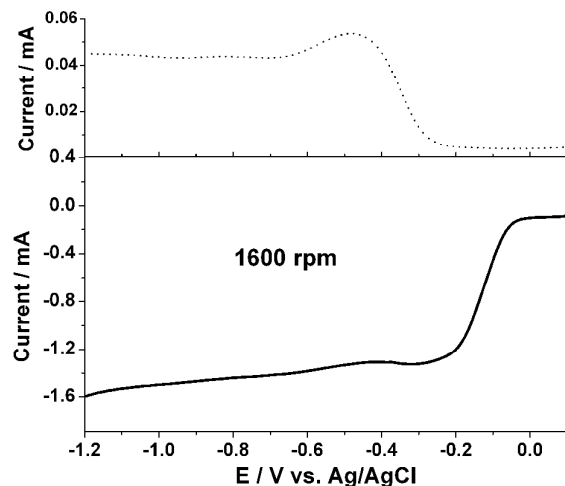

**Figure S6.** Polarization curves obtained with a rotating disk-ring electrode for ORR on SN-OMC-4 catalyst ( $0.306 \text{ mg/cm}^2$ ) in  $0.1 \text{ M NaOH}$ . Rotation rates are indicated in the graph; sweep rate  $10 \text{ mVs}^{-1}$ ; ring potential  $+500 \text{ mV}$  vs. Ag/AgCl; ring and disk areas are  $0.2467 \text{ cm}^2$  and  $0.1867 \text{ cm}^2$ , respectively; collection efficiency 37 %.

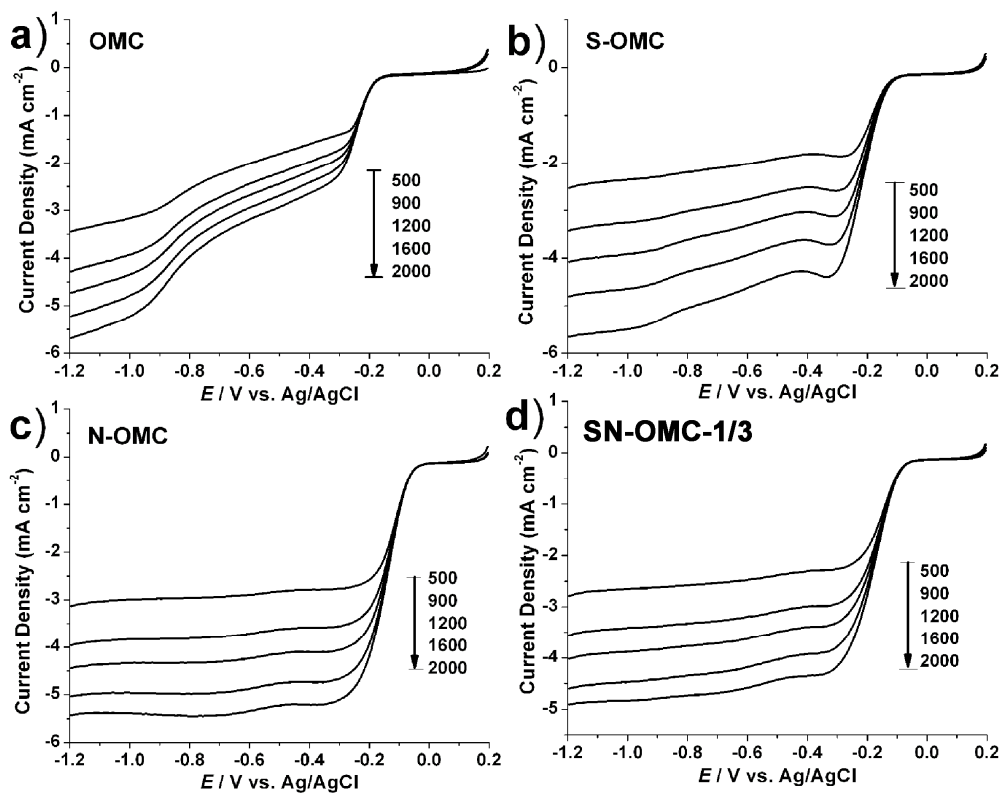

**Figure S7.** Linear sweep voltammograms of a) OMC, b) S-OMC, c) N-OMC, and d) dual-doped SN-OMC-1/3 on GC electrodes in O<sub>2</sub>-saturated 0.1 M NaOH solution at different rotation speeds with a scan rate of 10 mV·S<sup>-1</sup>.

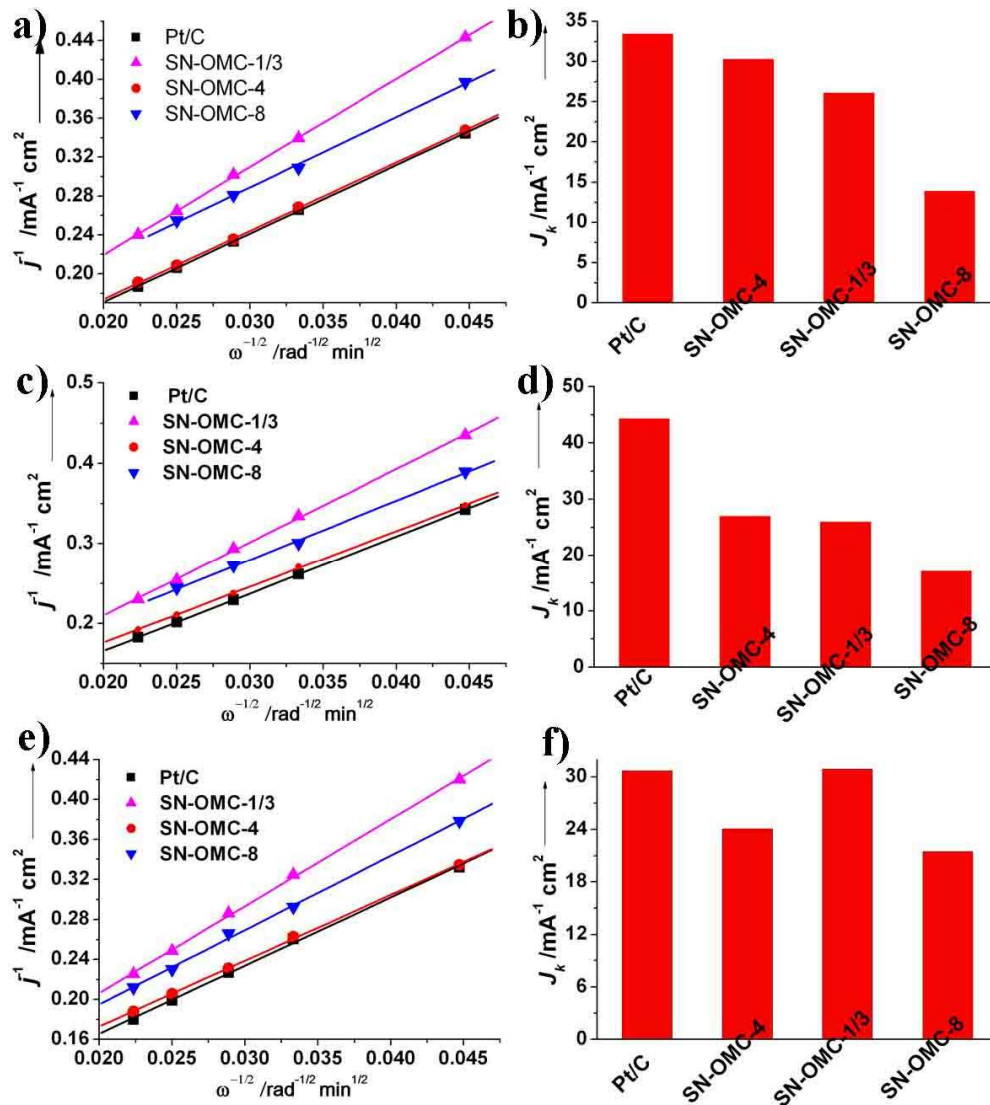

Figure S8. K-L plots and the corresponding kinetic limiting currents of SN-OMC-1/3, SN-OMC-4, SN-OMC-8 as well as Vulcan Pt/C obtained at different potentials: a, b) -0.3 V; c, d) -0.4 V; e, f) -0.5 V.

### 3. Koutechy-Levich equations and the transfer electron number calculations

The transfer electron number per oxygen molecule involved in the oxygen reduction at SN-OMCs electrodes was determined on the basis of the Koutechy-Levich equation<sup>1,2</sup> given below:

$$I^{-1} = I_k^{-1} + (0.62nFD^{2/3}v^{-1/6}\omega^{1/2})^{-1}$$

where  $I_k$  is the kinetics current density,  $I$  is the measured current density of the ORR,  $n$  represents the number of electrons transferred per oxygen molecule,  $F$  is the Faraday constant ( $F=96485 \text{ C}\cdot\text{mol}^{-1}$ ),  $C$  is the bulk concentration of  $\text{O}_2$  ( $= 1.2 \times 10^{-3} \text{ mol}\cdot\text{L}^{-1}$ ),  $D$  is the diffusion coefficient of  $\text{O}_2$  in the KOH electrolyte ( $=1.9 \times 10^{-5} \text{ cm}^2 \text{ S}^{-1}$ ),  $v$  is the kinetic viscosity of the electrolyte ( $=0.01 \text{ cm}^2 \text{ S}^{-1}$ ), and  $\omega$  is the angular velocity of the the disk ( $\omega = 2\pi N$ ,  $N$  is the linear rotation speed ).

## Reference

1. Chen, W. & Chen, S. W. Oxygen Electroreduction Catalyzed by Gold Nanoclusters: Strong Core Size Effects. *Angew Chem Int Edit* **48**, 4386-4389 (2009).
2. Xu, J. X. Dong, G. F. Jin, C. H. Huang, M. H. & Guan, L.H. Sulfur and Nitrogen Co-Doped, Few-Layered Graphene Oxide As a Highly Efficient Electrocatalyst for the Oxygen Redution Reaction. *ChemSusChem* **6**, 493-499 (2013).
